# Supplementary material for: Synthesis, Electronic, and Antibacterial Properties of 3,7-Di(hetero)aryl-substituted Phenothiazinyl N-Propyl Trimethylammonium Salts
Source: MDPI journal article supplement (doi:10.3390/molecules29092126), 2024-05-03
Supplement: s1 [file s1]

# Synthesis, electronic, and antibacterial properties of 3,7-di(hetero)arylsubstituted phenothiazinyl *N*-propyl trimethylammonium salts

Hilla Khelwati,<sup>a</sup> NN,<sup>a</sup> NN,<sup>b</sup> Rainer Kalscheuer,<sup>b</sup> Thomas J. J. Müller<sup>\*a</sup>

<sup>a</sup> Heinrich Heine University Düsseldorf, Faculty of Mathematics and Natural Sciences, Institute of Organic Chemistry and Macromolecular Chemistry, Universitätsstrasse 1, D-40225 Düsseldorf, Germany

<sup>b</sup> Heinrich Heine University Düsseldorf, Faculty of Mathematics and Natural Sciences, Institute of Pharmaceutical Biology and Biotechnology, Universitätsstrasse 1, D-40225 Düsseldorf, Germany

E-mail: ThomasJJ.Mueller@hhu.de

## Content

|      |                                                                                                             |                                    |
|------|-------------------------------------------------------------------------------------------------------------|------------------------------------|
| 1.   | <sup>1</sup> H and <sup>13</sup> C NMR spectra of compounds 7 and 8.....                                    | 2                                  |
| 2.   | Correlation studies.....                                                                                    | 12                                 |
| 2.1. | Correlation of E <sub>0</sub> <sup>0/+1</sup> of compounds 7 and 8 against Hammett parameters .....         | 12                                 |
| 2.2. | Correlation of absorption, emission, and Stokes shift of compounds 7 and 8 against Hammett parameters ..... | 16                                 |
| 3.   | Antibacterial activity .....                                                                                | Fehler! Textmarke nicht definiert. |

# 1. $^1\text{H}$ and $^{13}\text{C}$ NMR spectra of compounds **7** and **8**

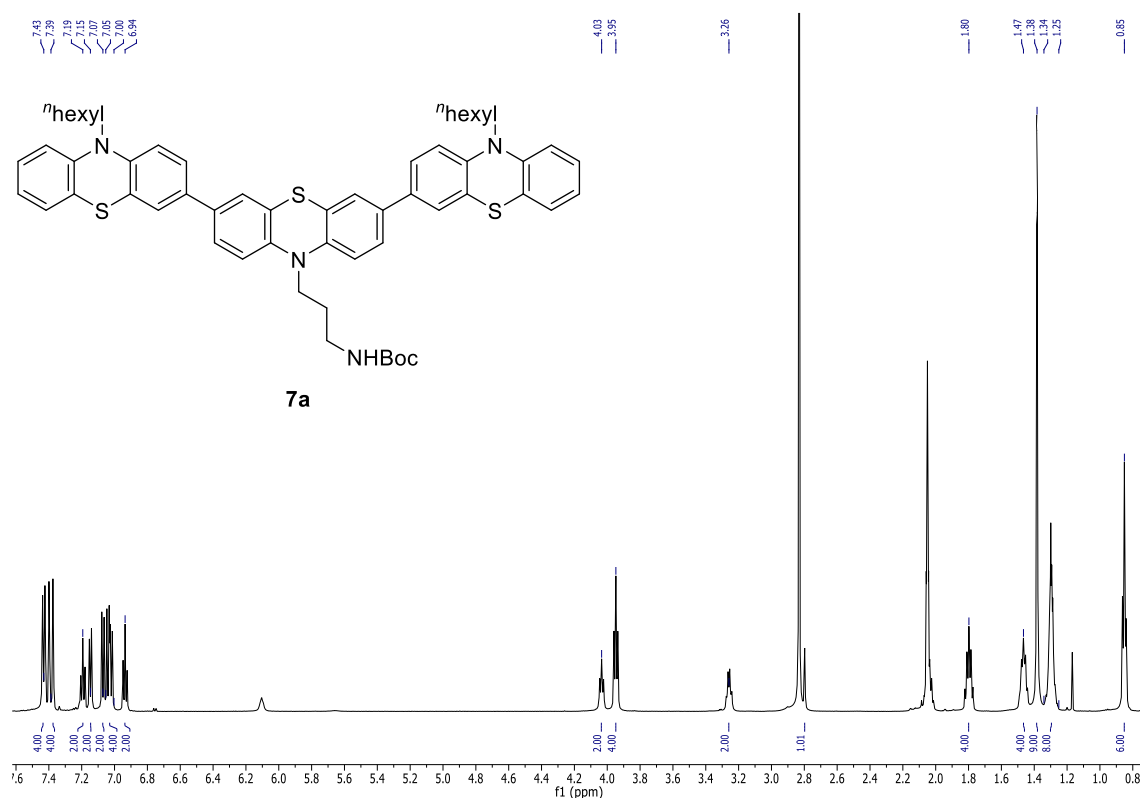

**Figure S1.**  $^1\text{H}$  NMR spectrum of compound **7a** (600 MHz, acetone- $\text{d}_6$ , 298 K).

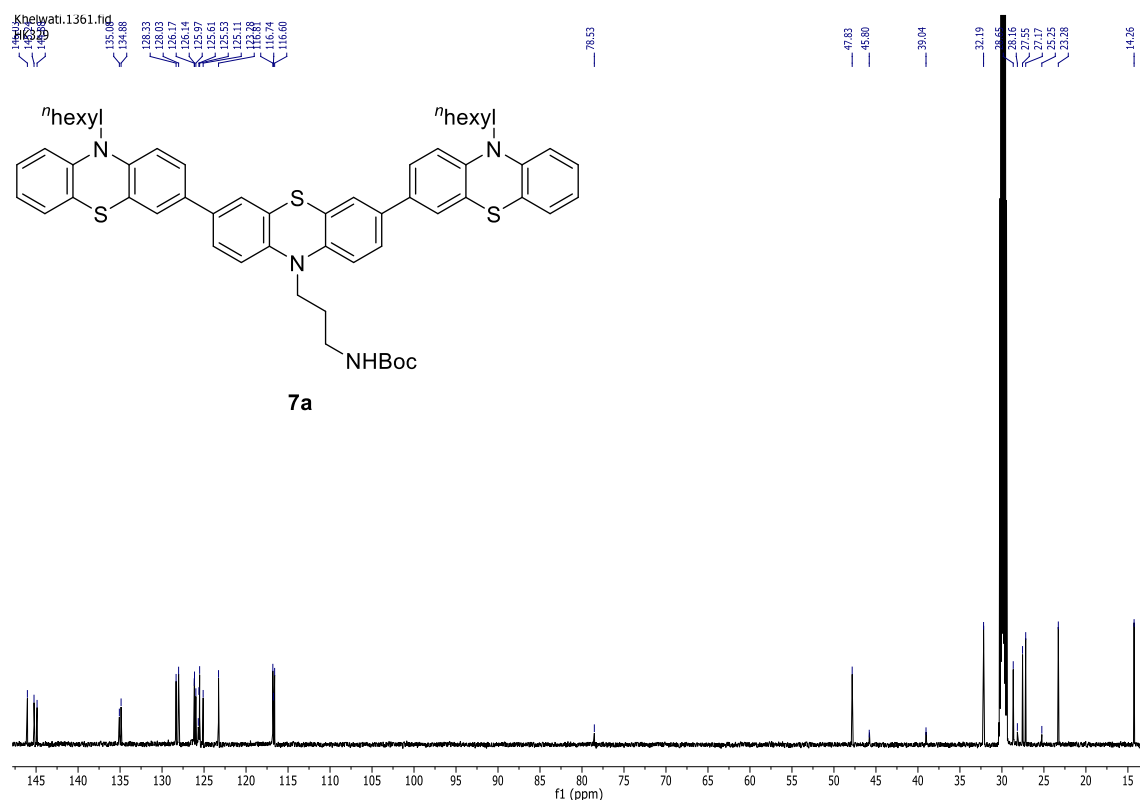

**Figure S2.**  $^{13}\text{C}$  NMR spectrum of compound **7a** (151 MHz, acetone- $\text{d}_6$ , 298 K).

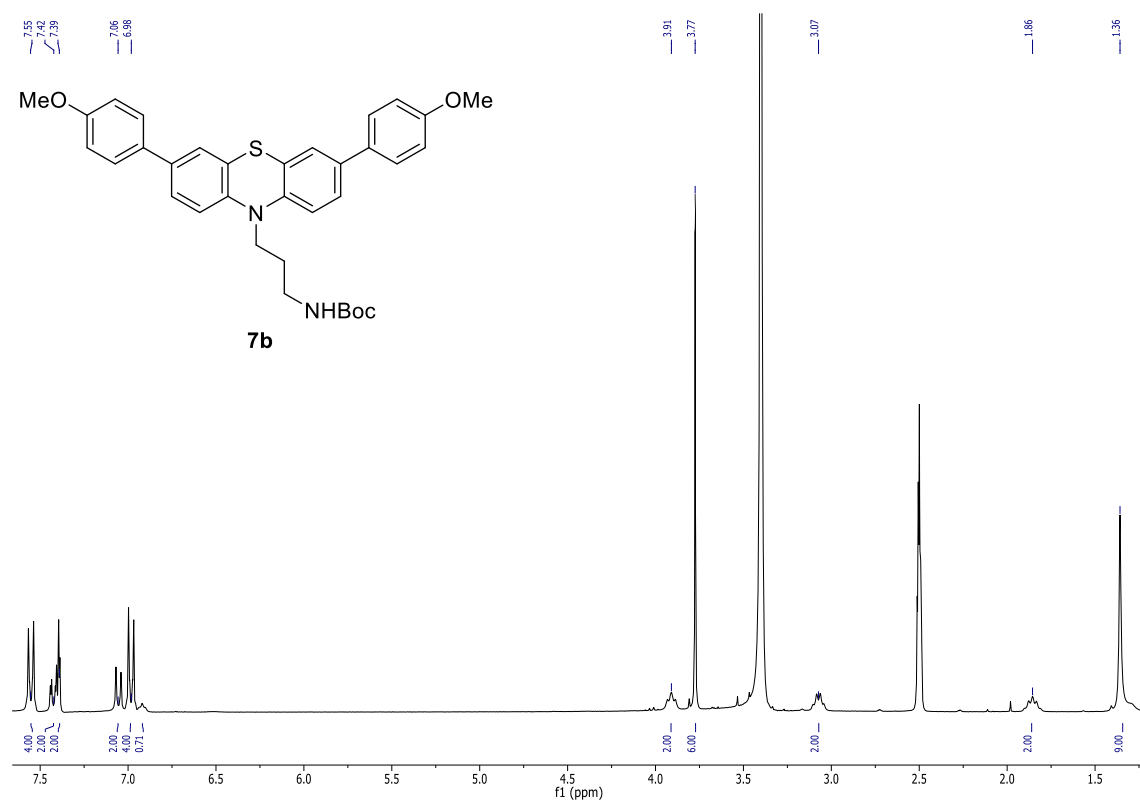

**Figure S3.** <sup>1</sup>H NMR spectrum of compound **7b** (300 MHz, DMSO-d<sub>6</sub>, 298 K).

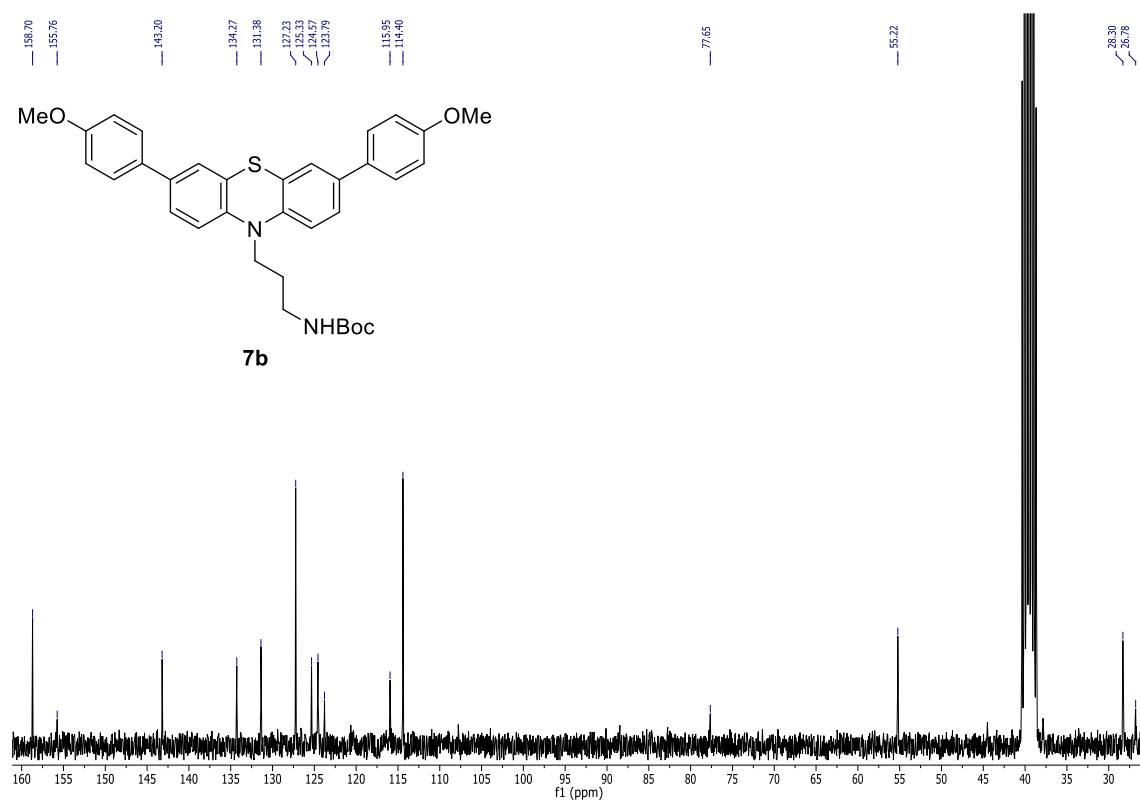

**Figure S4.** <sup>13</sup>C NMR spectrum of compound **7b** (75 MHz, DMSO-d<sub>6</sub>, 298 K).

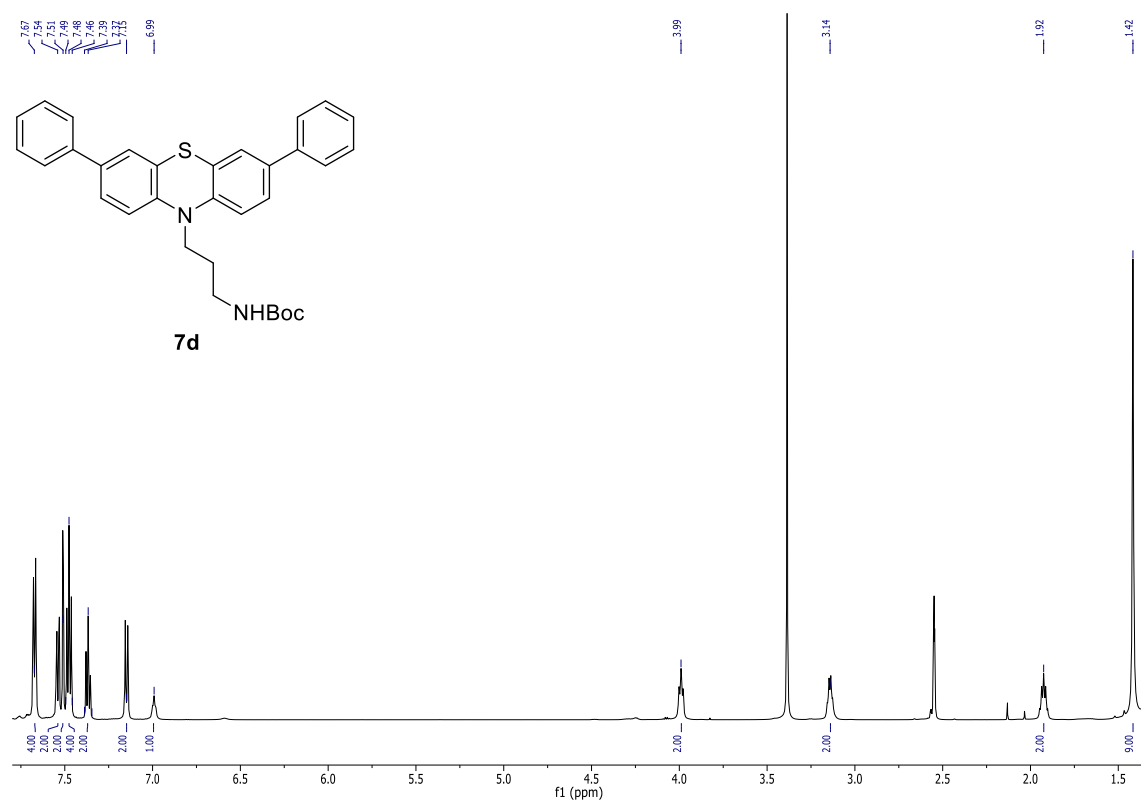

**Figure S5.**  $^1\text{H}$  NMR spectrum of compound **7d** (600 MHz, acetone- $\text{d}_6$ , 298 K).

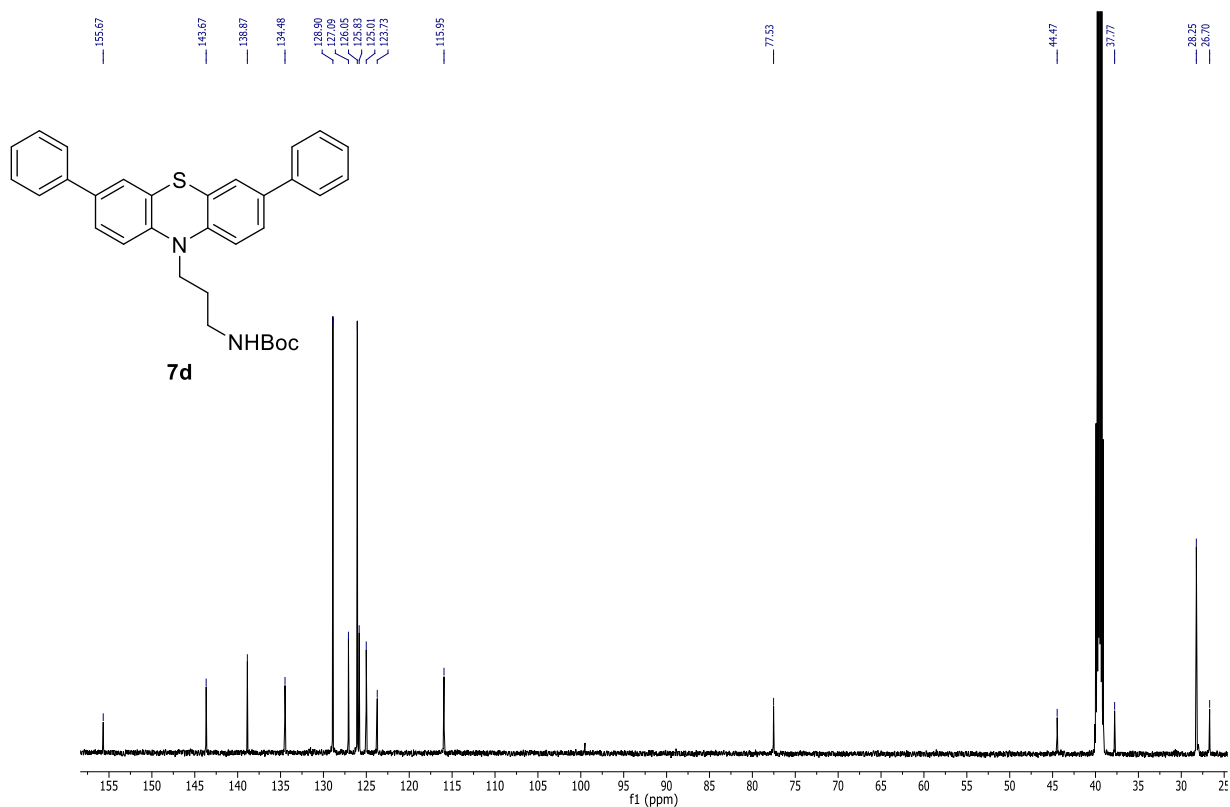

**Figure S6.**  $^{13}\text{C}$  NMR spectrum of compound **7d** (151 MHz, acetone- $\text{d}_6$ , 298 K).

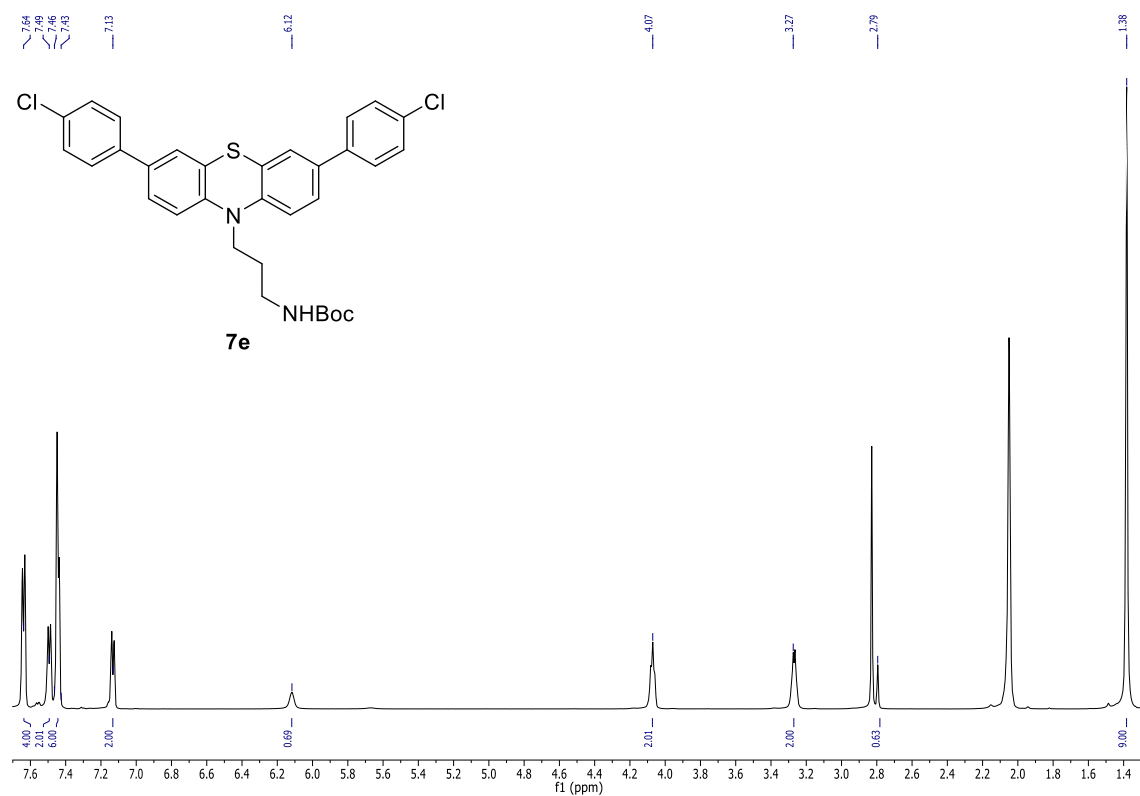

**Figure S7.** <sup>1</sup>H NMR spectrum of compound **7e** (600 MHz, acetone-d<sub>6</sub>, 298 K).

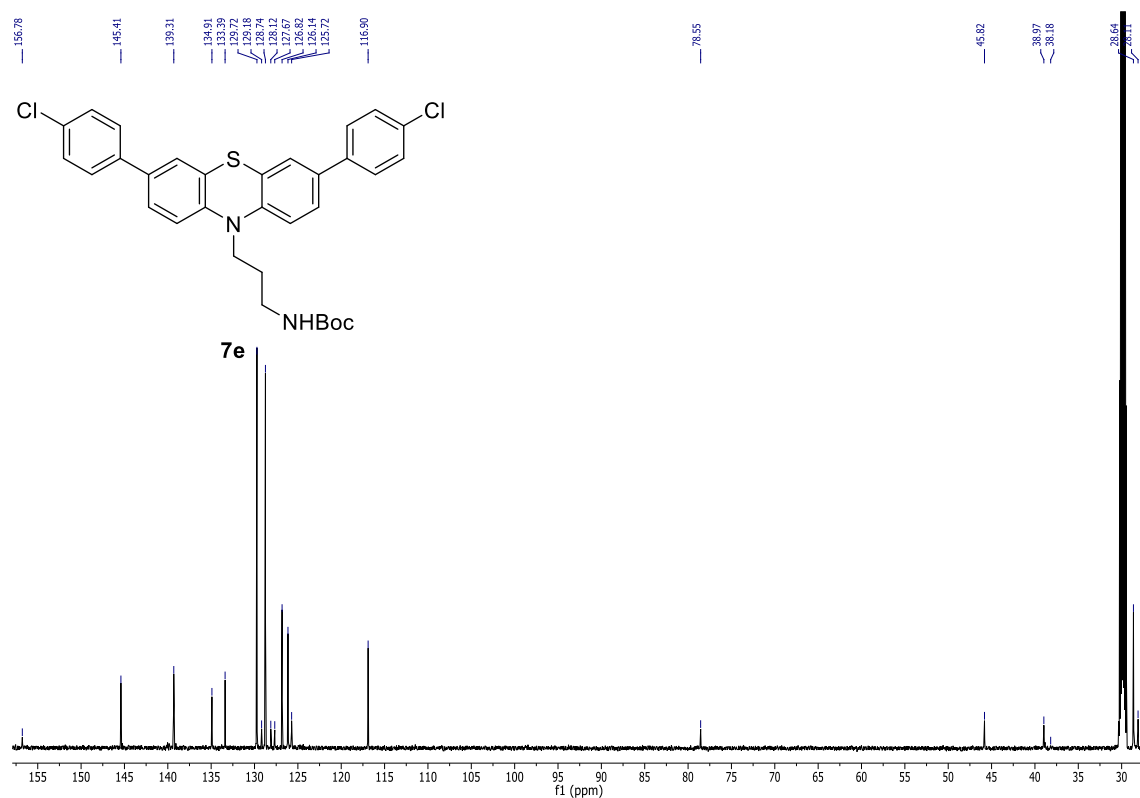

**Figure S8.** <sup>13</sup>C NMR spectrum of compound **7e** (151 MHz, acetone-d<sub>6</sub>, 298 K).

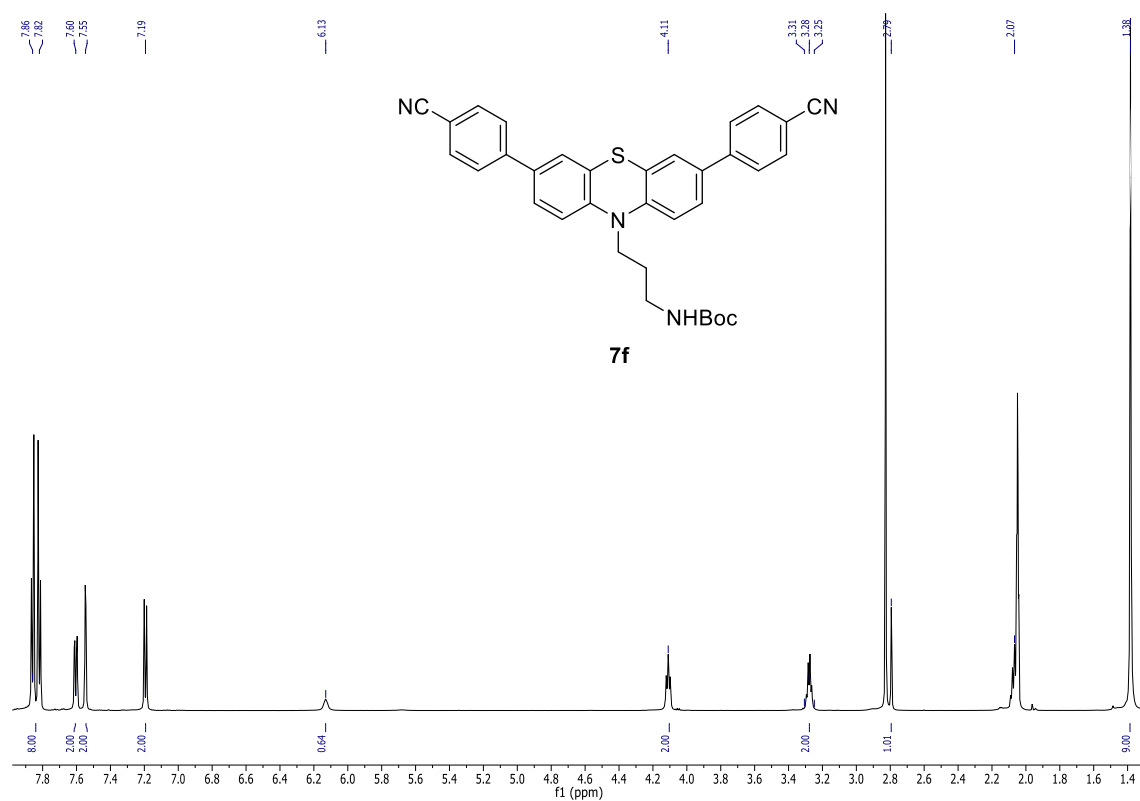

**Figure S9.** <sup>1</sup>H NMR spectrum of compound **7f** (600 MHz, acetone-d<sub>6</sub>, 298 K).

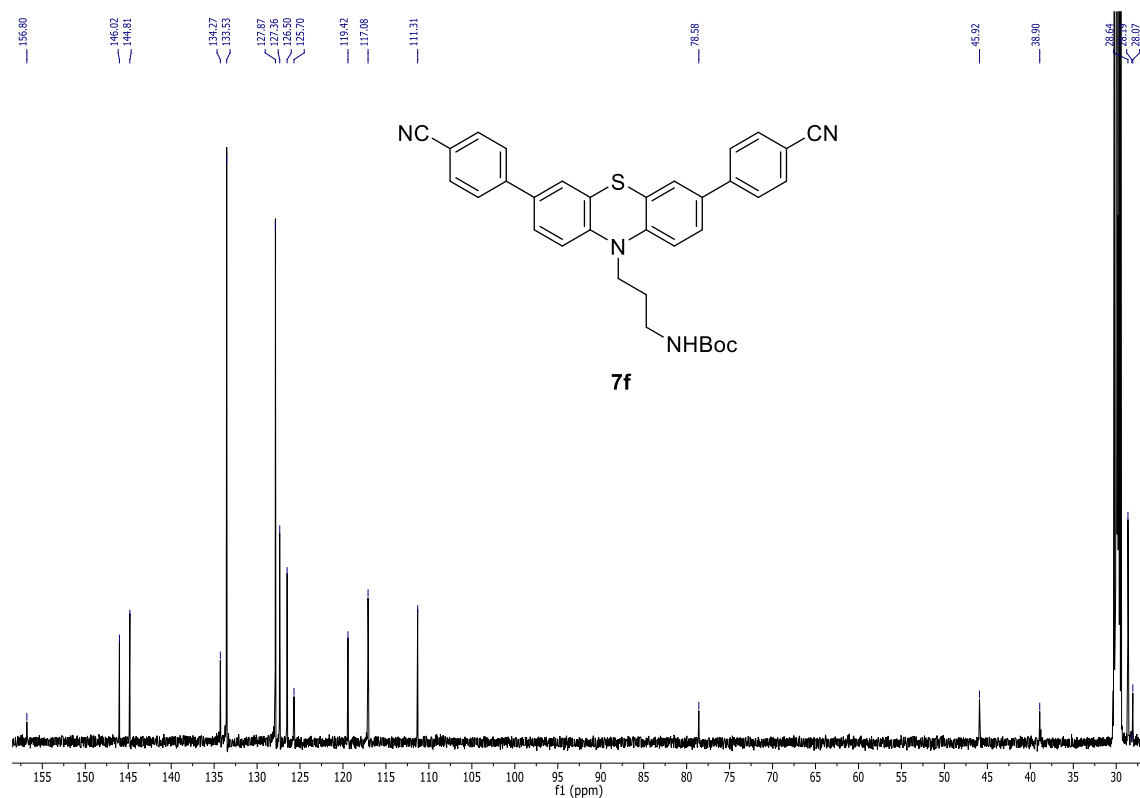

**Figure S10.** <sup>13</sup>C NMR spectrum of compound **7f** (151 MHz, acetone-d<sub>6</sub>, 298 K).

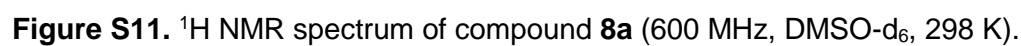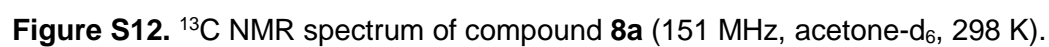

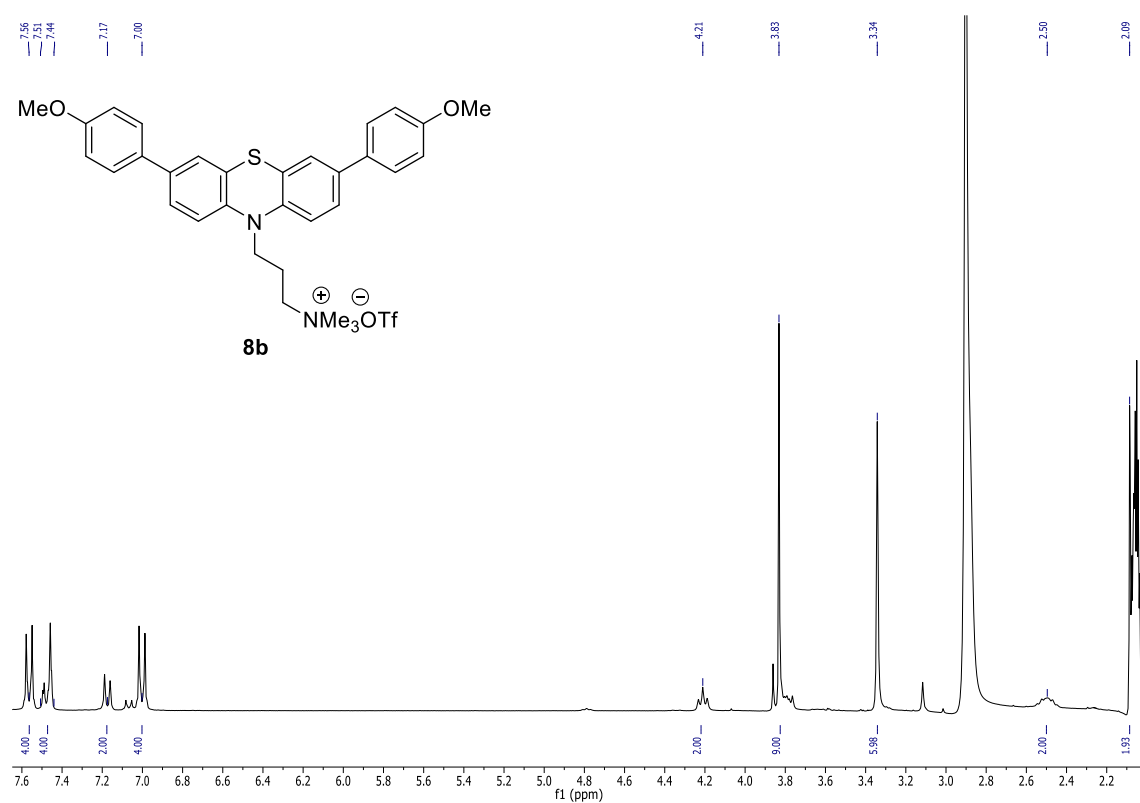

**Figure S13.**  $^1\text{H}$  NMR spectrum of compound **8b** (300 MHz, acetone- $\text{d}_6$ , 298 K).

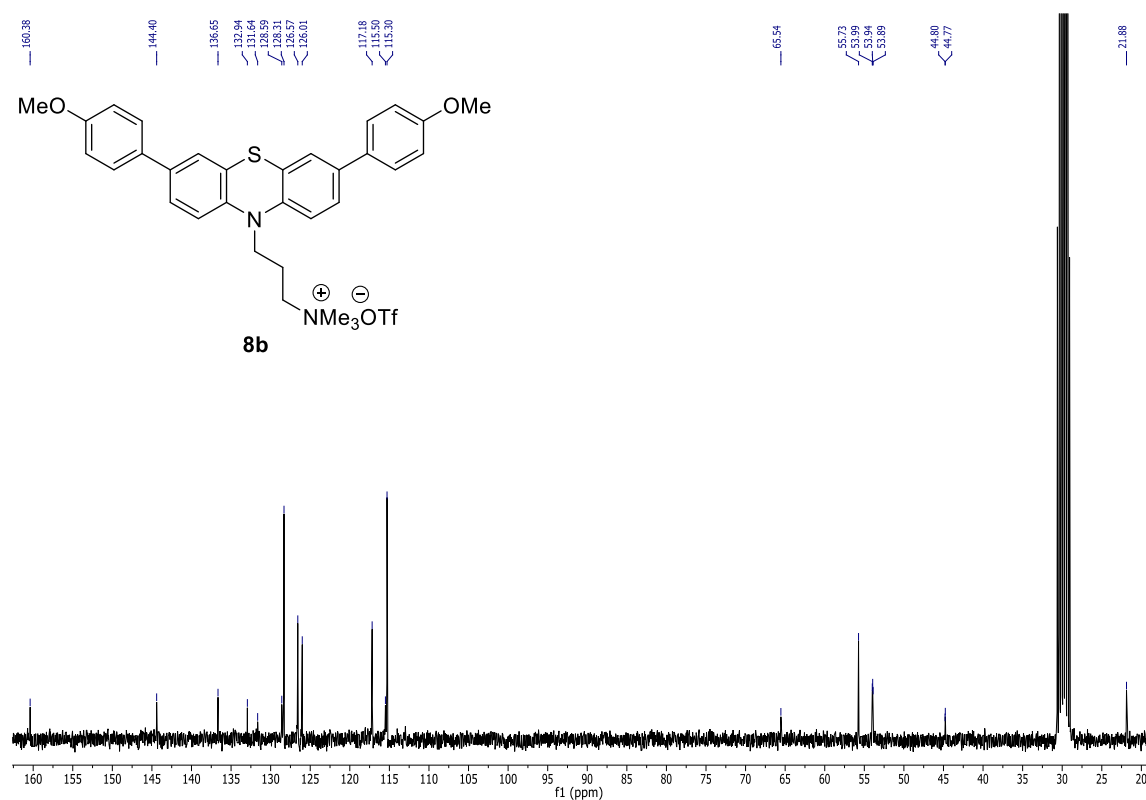

**Figure S14.**  $^{13}\text{C}$  NMR spectrum of compound **8b** (75 MHz, acetone- $\text{d}_6$ , 298 K).



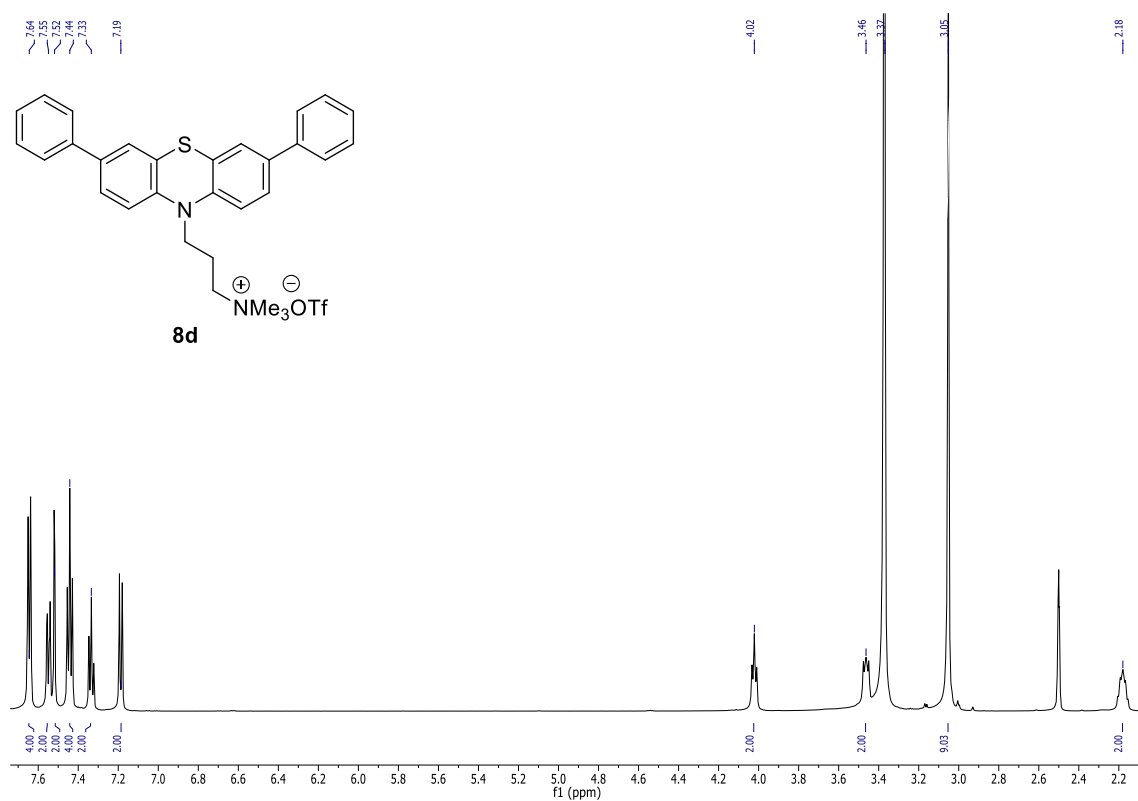

**Figure S15.** <sup>1</sup>H NMR spectrum of compound **8d** (600 MHz, DMSO-d<sub>6</sub>, 298 K).

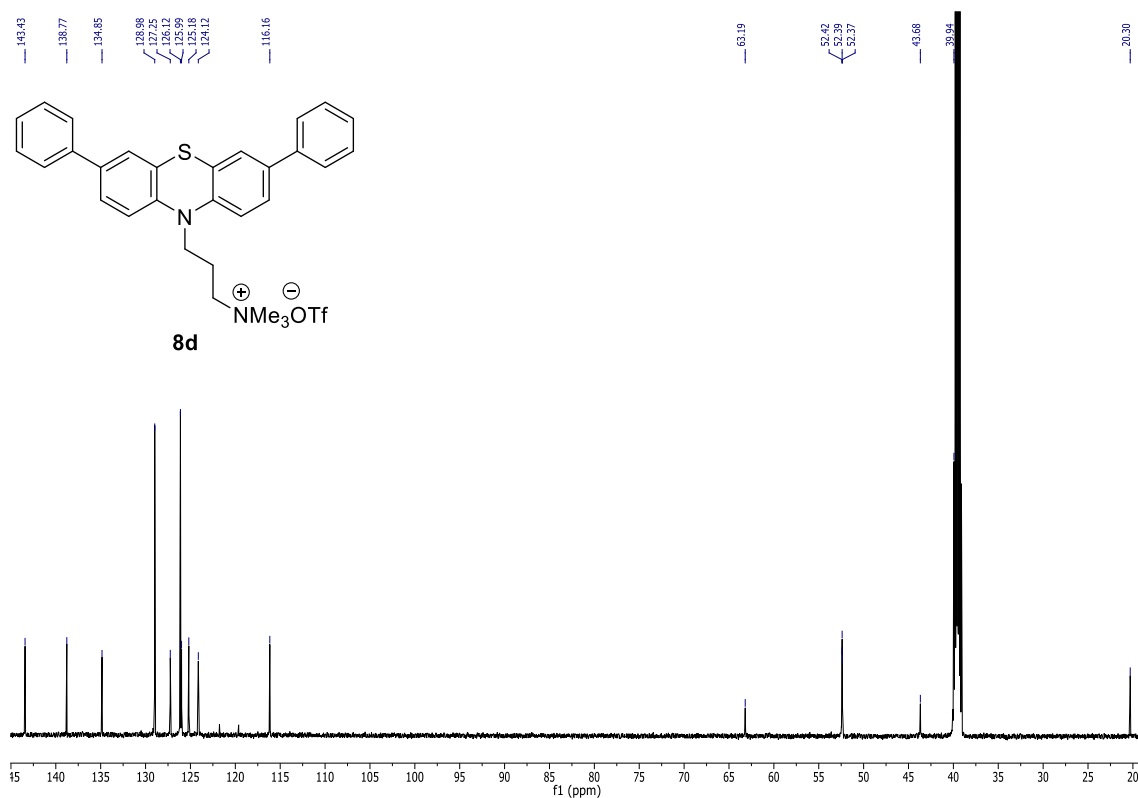

**Figure S16.** <sup>13</sup>C NMR spectrum of compound **8d** (151 MHz, DMSO-d<sub>6</sub>, 298 K).

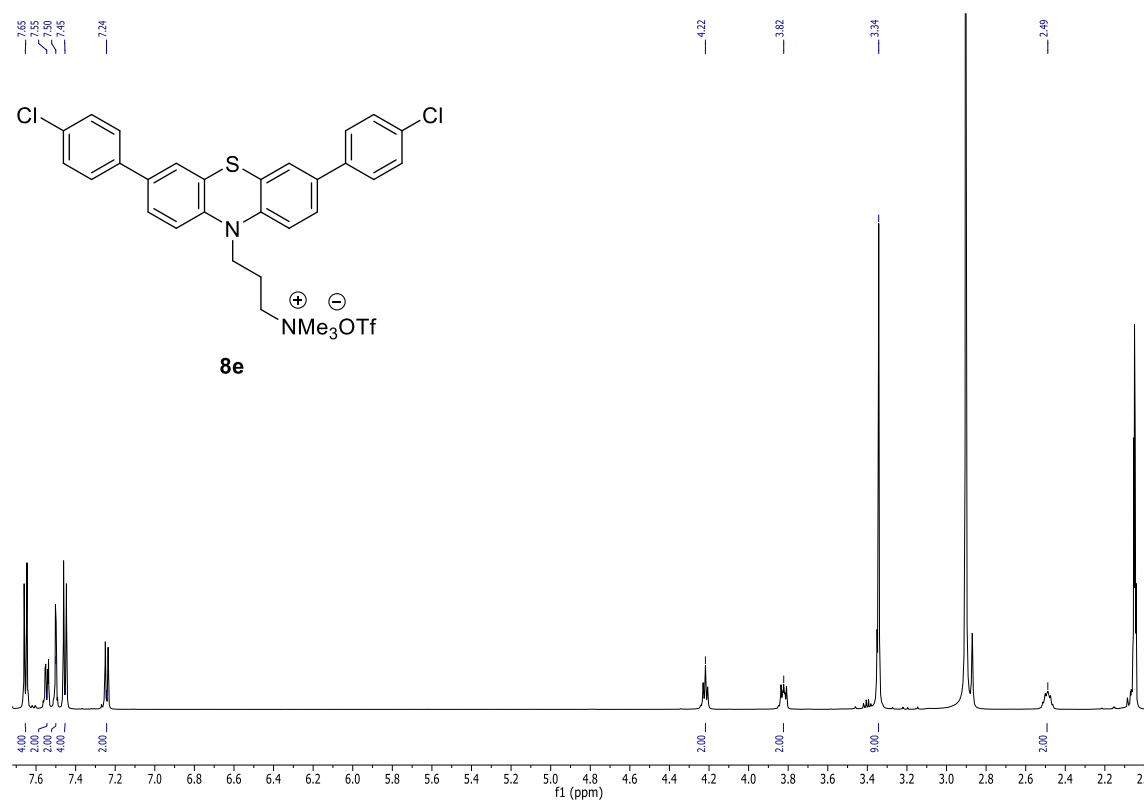

**Figure S17.** <sup>1</sup>H NMR spectrum of compound **8e** (600 MHz, acetone-d<sub>6</sub>, 298 K).

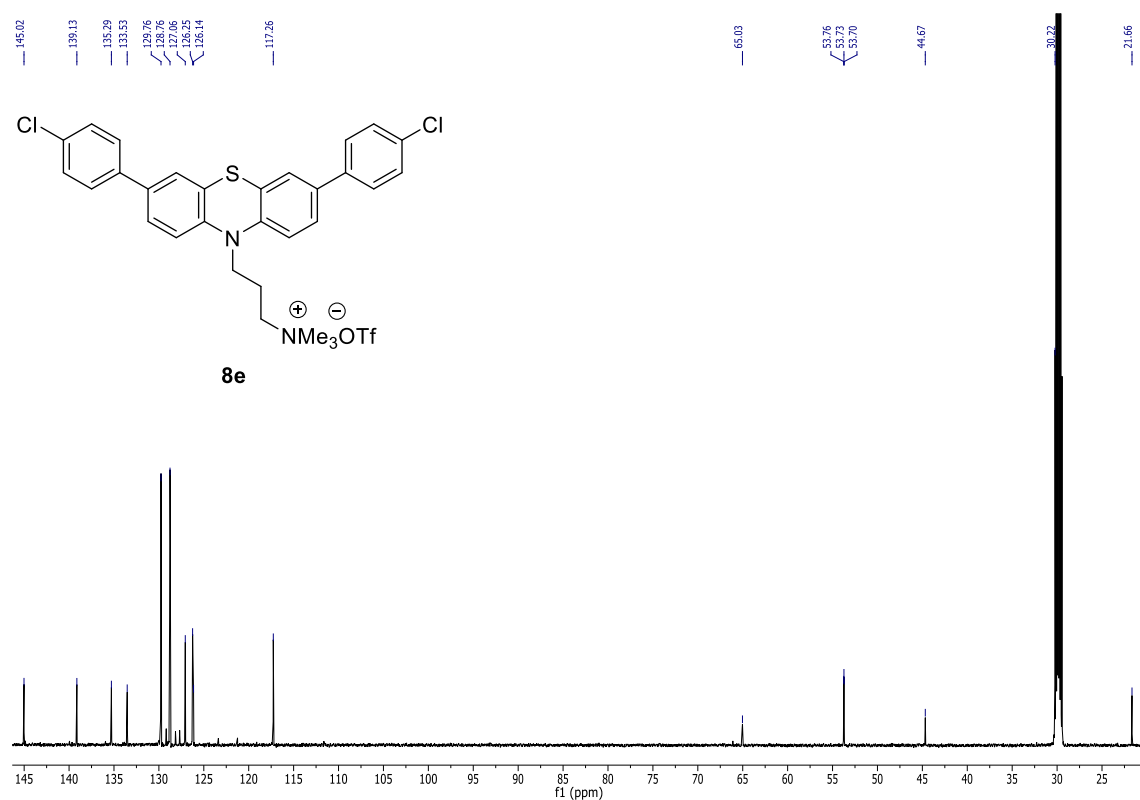

**Figure S18.** <sup>13</sup>C NMR spectrum of compound **8e** (151 MHz, acetone-d<sub>6</sub>, 298 K).

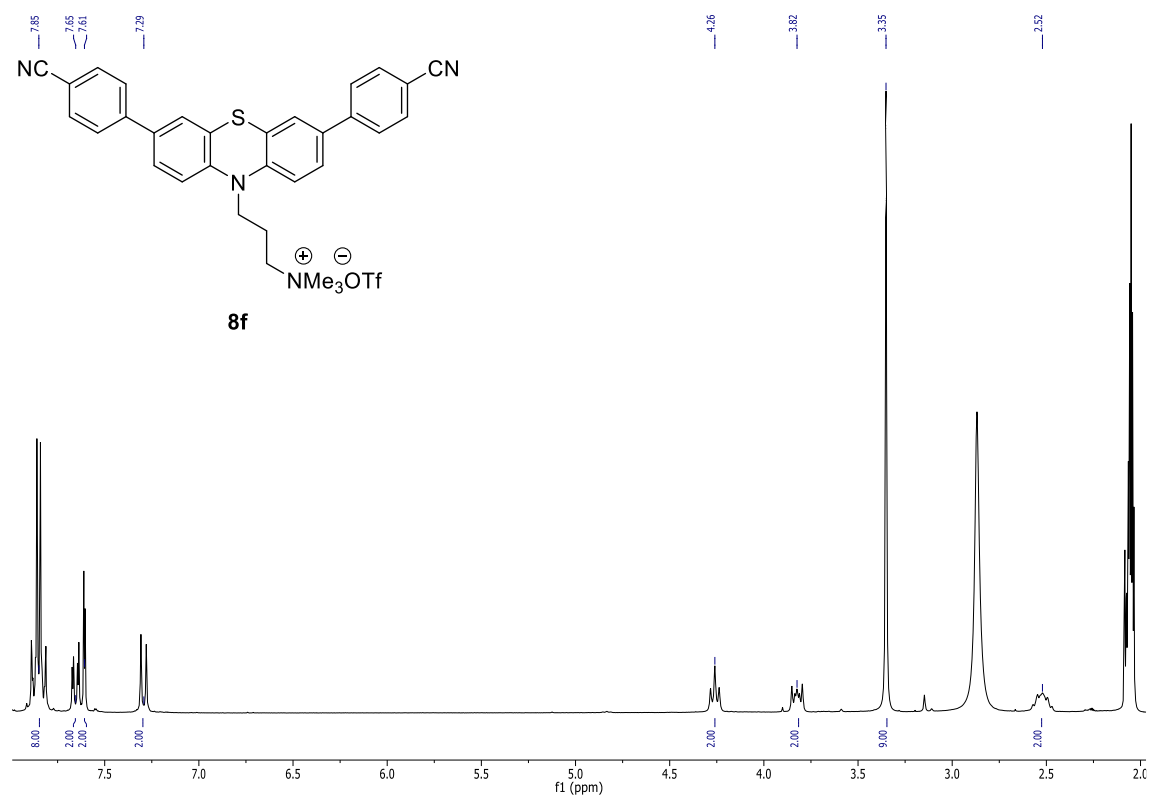

**Figure S19.**  $^1\text{H}$  NMR spectrum of compound **8f** (300 MHz, acetone- $d_6$ , 298 K).

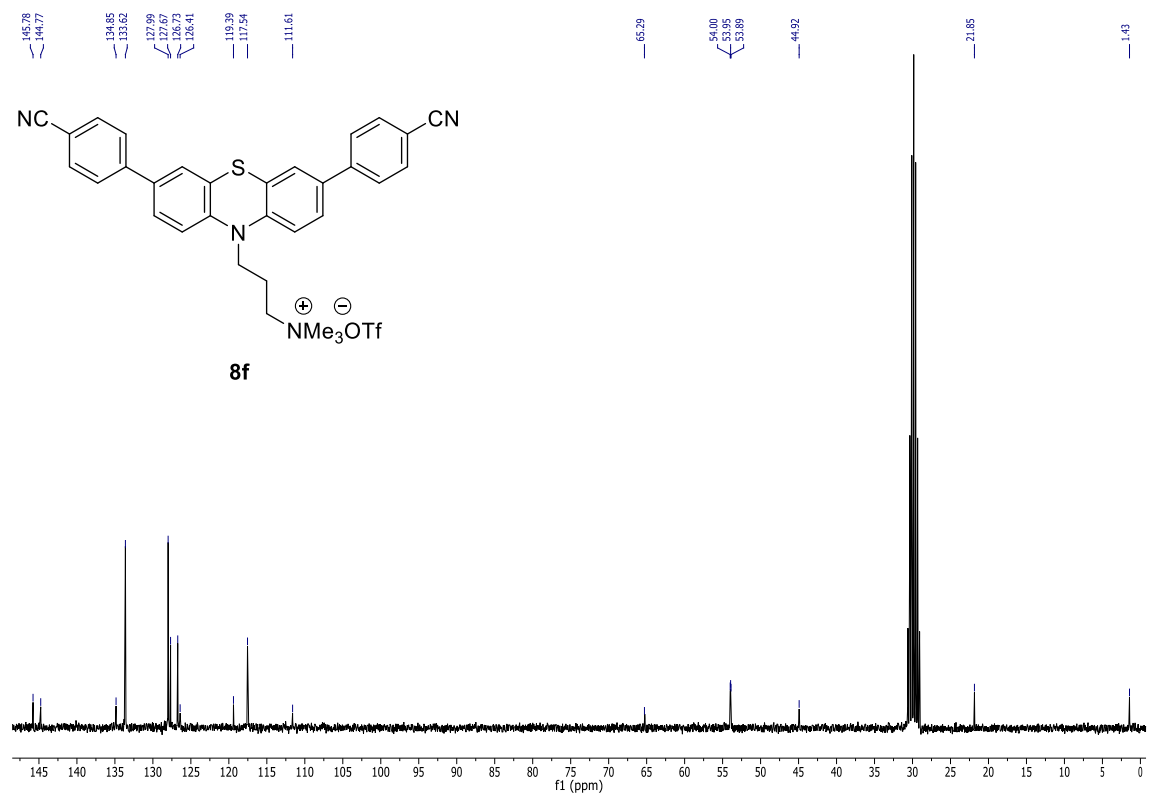

**Figure S20.**  $^{13}\text{C}$  NMR spectrum of compound **8f** (75 MHz, acetone- $d_6$ , 298 K).

## 2. Correlation studies

### 2.1. Correlation of $E_0^{0/+1}$ of compounds **7** and **8** against Hammett parameters

#### Compounds **7**

**Table S1.** Selected Hammett parameters and oxidation potentials  $E_0^{0/+1}$  of compounds **7b-f**.

| compounds | $\sigma_p$ | $\sigma_{p+}$ | $\sigma_{p-}$ | $\sigma_R$ | $\sigma_{R+}$ | $E_0^{0/+1}$ [V] |
|-----------|------------|---------------|---------------|------------|---------------|------------------|
| <b>7b</b> | -0.27      | -0.78         | -0.27         | -0.43      | -1.07         | 0.64             |
| <b>7c</b> | 0.05       | -0.43         | 0.05          | -0.14      | -0.56         | 0.69             |
| <b>7d</b> | 0.06       | -0.18         | 0.06          | -0.08      | -0.3          | 0.7              |
| <b>7e</b> | 0.23       | 0.11          | 0.23          | -0.16      | -0.31         | 0.73             |
| <b>7f</b> | 0.66       | 0.66          | 0.66          | 0.16       | 0.15          | 0.83             |

$$\sigma_p: E_0^{0/+1} = 0.2067 \cdot \sigma_p + 0.6878 \text{ [V]} (R^2 = 0.9903)$$

$$\sigma_{p+}: E_0^{0/+1} = 0.1265 \cdot \sigma_{p+} + 0.7337 \text{ [V]} (R^2 = 0.9631)$$

$$\sigma_{p-}: E_0^{0/+1} = 0.1464 \cdot \sigma_{p-} + 0.6846 \text{ [V]} (R^2 = 0.9491)$$

$$\sigma_R: E_0^{0/+1} = 0.3091 \cdot \sigma_R + 0.7582 \text{ [V]} (R^2 = 0.8537)$$

$$\sigma_{R+}: E_0^{0/+1} = 0.1482 \cdot \sigma_{R+} + 0.78 \text{ [V]} (R^2 = 0.877)$$

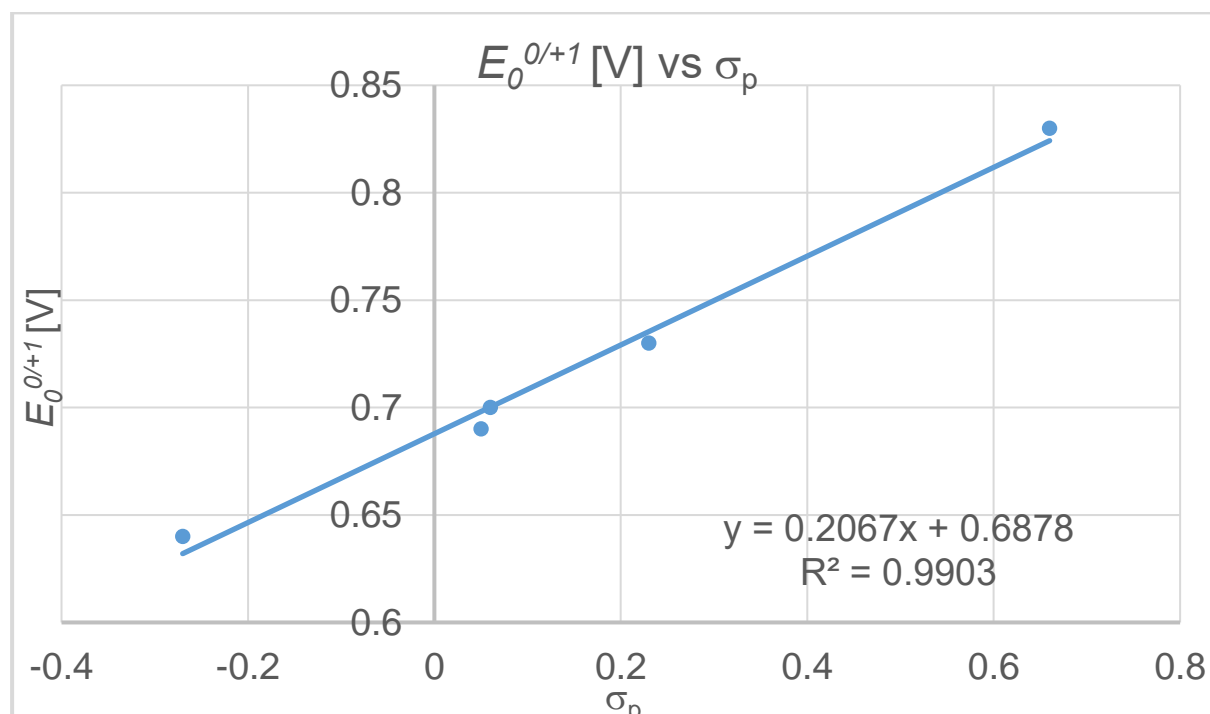

**Figure S21.** Hammett correlation of  $E_0^{0/+1}$  of compounds **7b-f** against  $\sigma_p$ .

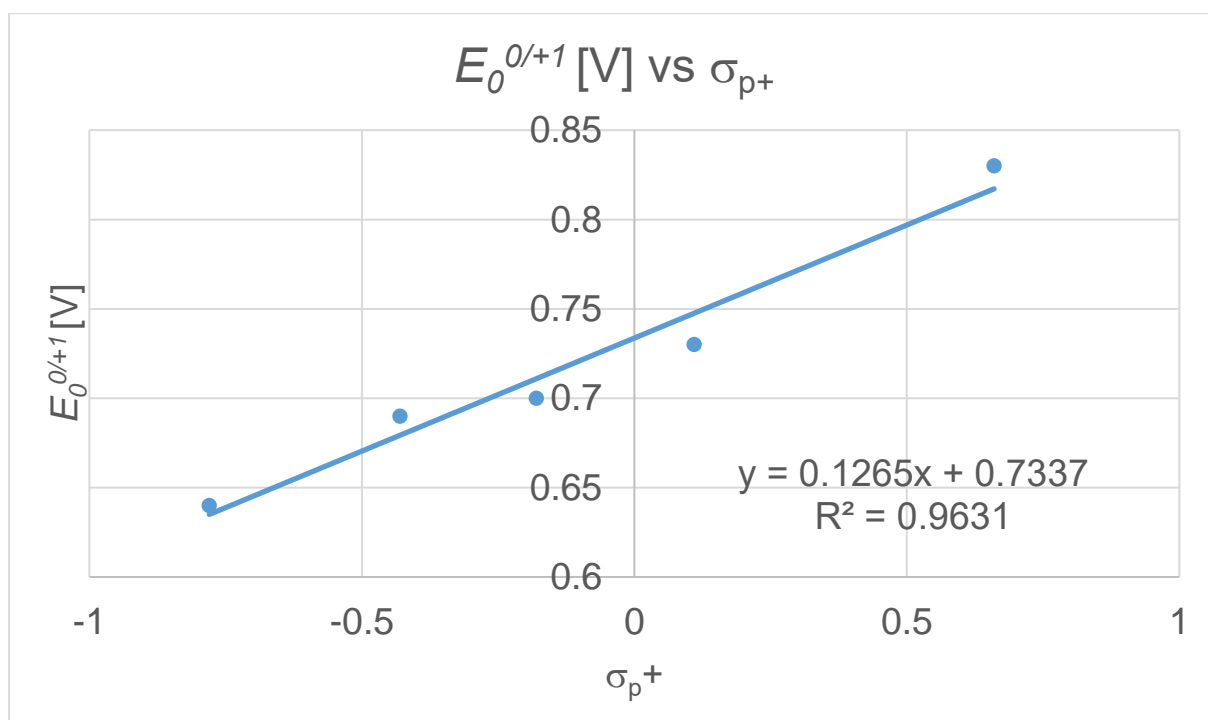

**Figure S22.** Hammett correlation of  $E_0^{0/+1}$  of compounds **7b-f** against  $\sigma_{p+}$ .

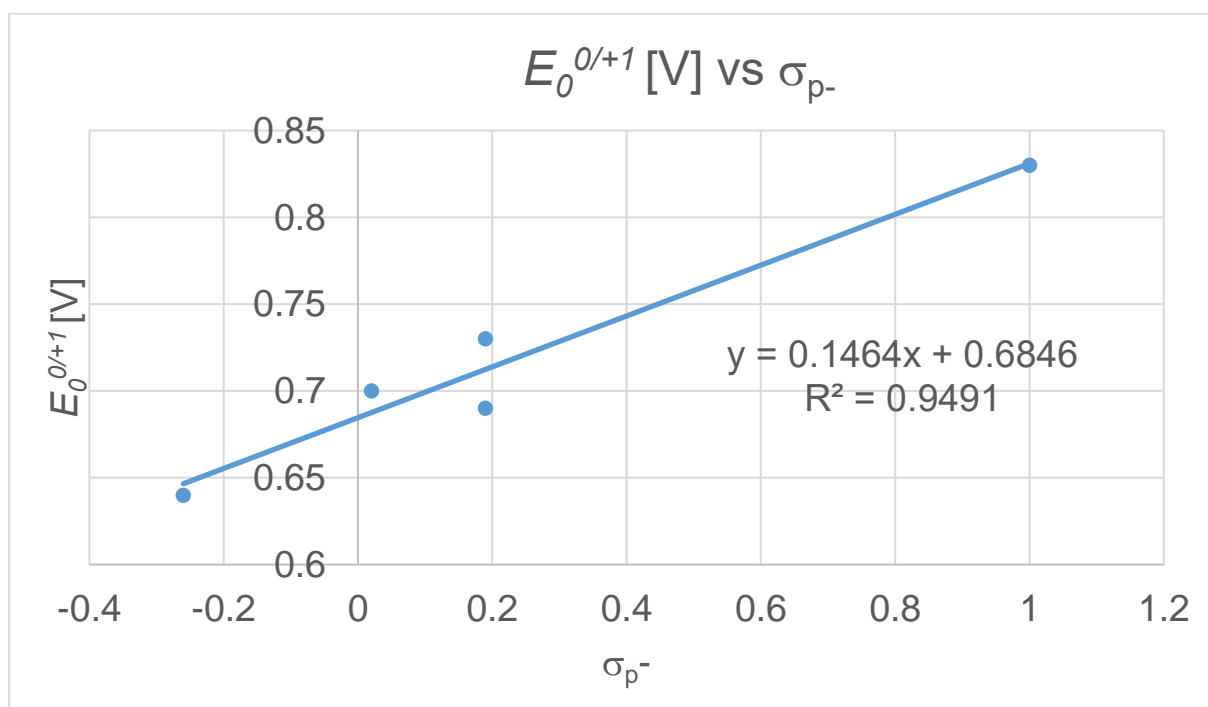

**Figure S23.** Hammett correlation of  $E_0^{0/+1}$  of compounds **7b-f** against  $\sigma_{p-}$ .

## Compounds 8

**Table S2.** Selected Hammett parameters and oxidation potentials  $E_0^{0/+1}$  of compounds **8b-f**.

| compounds | $\sigma_p$ | $\sigma_{p+}$ | $\sigma_{p-}$ | $\sigma_R$ | $\sigma_{R+}$ | $E_0^{0/+1}$ [V] |
|-----------|------------|---------------|---------------|------------|---------------|------------------|
| <b>8b</b> | -0.27      | -0.78         | -0.27         | -0.43      | -1.07         | 0.68             |
| <b>8c</b> | 0.05       | -0.43         | 0.05          | -0.14      | -0.56         | 0.72             |
| <b>8d</b> | 0.06       | -0.18         | 0.06          | -0.08      | -0.3          | 0.73             |
| <b>8e</b> | 0.23       | 0.11          | 0.23          | -0.16      | -0.31         | 0.77             |
| <b>8f</b> | 0.66       | 0.66          | 0.66          | 0.16       | 0.15          | 0.84             |

$$\sigma_p: E_0^{0/+1} = 0.1772 \cdot \sigma_p + 0.7221 \text{ [V]} (R^2 = 0.9855)$$

$$\sigma_{p+}: E_0^{0/+1} = 0.1099 \cdot \sigma_{p+} + 0.7616 \text{ [V]} (R^2 = 0.9839)$$

$$\sigma_{p-}: E_0^{0/+1} = 0.1229 \cdot \sigma_{p-} + 0.72 \text{ [V]} (R^2 = 0.9056)$$

$$\sigma_R: E_0^{0/+1} = 0.3091 \cdot \sigma_R + 0.7582 \text{ [V]} (R^2 = 0.8537)$$

$$\sigma_{R+}: E_0^{0/+1} = 0.2579 \cdot \sigma_{R+} + 0.7815 \text{ [V]} (R^2 = 0.8046)$$

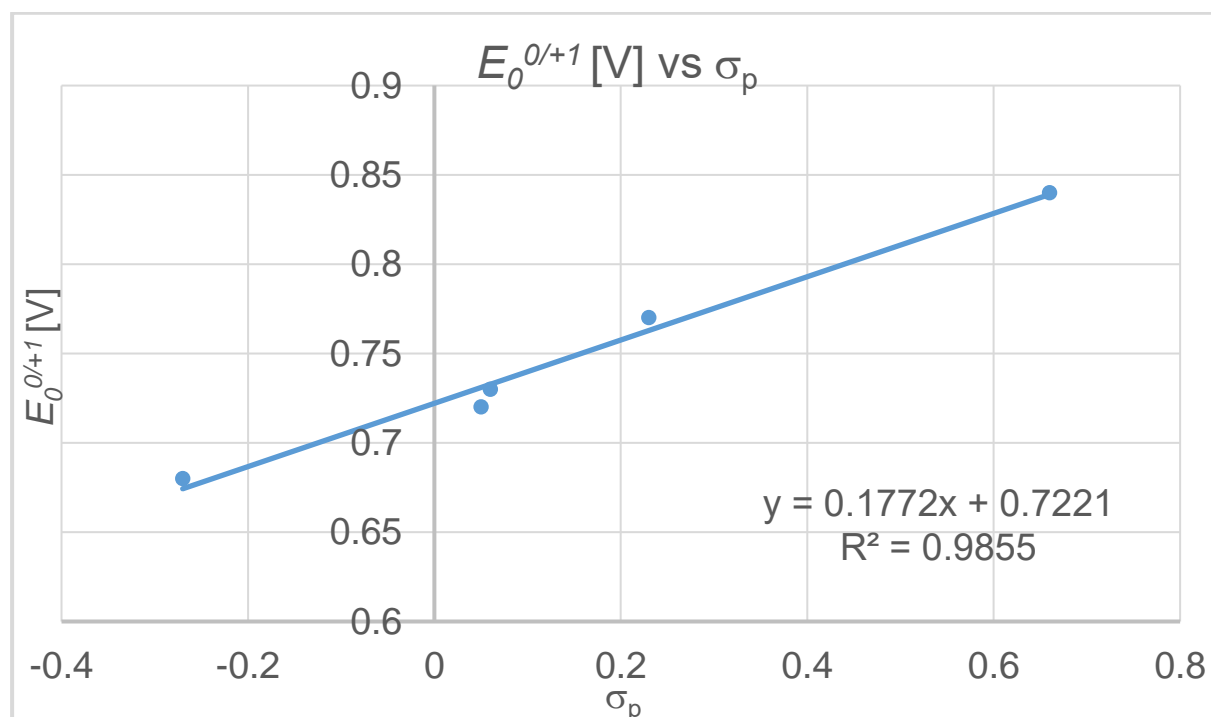

**Figure S24.** Hammett correlation of  $E_0^{0/+1}$  of compounds **8b-f** against  $\sigma_p$ .

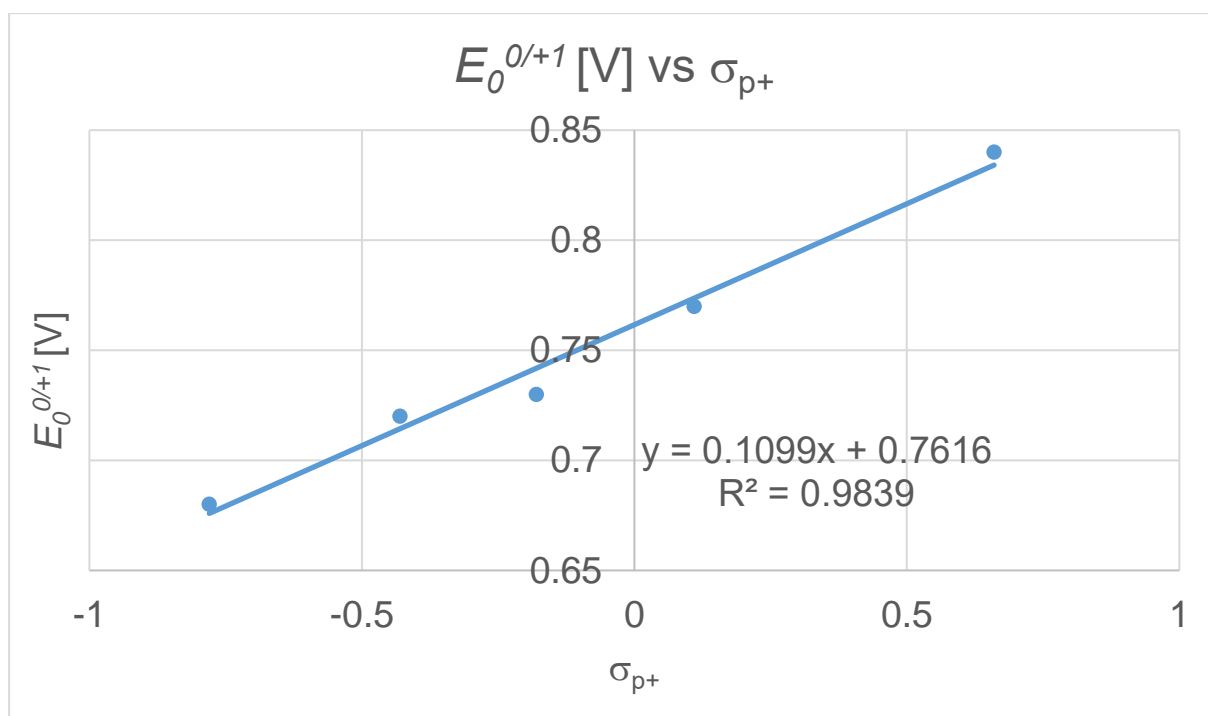

**Figure S25.** Hammett correlation of  $E_0^{0/+1}$  of compounds **8b-f** against  $\sigma_{p+}$ .

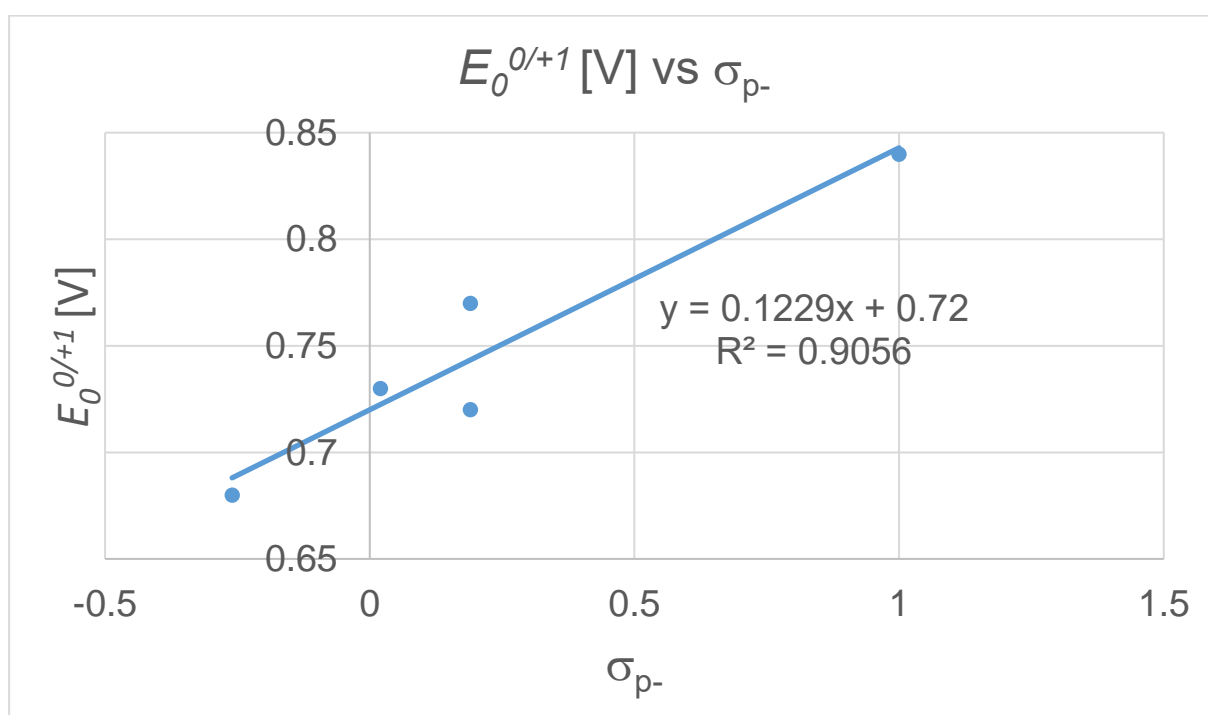

**Figure S26.** Hammett correlation of  $E_0^{0/+1}$  of compounds **8b-f** against  $\sigma_{p-}$ .

## 2.2. Correlation of absorption, emission, and Stokes shift of compounds 7 and 8 against Hammett parameters

### Compounds 7

**Table S3.** Selected Hammett parameters and  $\lambda_{\max, \text{abs}}$ ,  $\tilde{\nu}_{\max, \text{abs}}$ ,  $\lambda_{\max, \text{em}}$ ,  $\tilde{\nu}_{\max, \text{em}}$ , and  $\Delta\tilde{\nu}$  of compounds **7b-f**.

| $\sigma_p$ | $\sigma_{p+}$ | $\sigma_{p-}$ | $\sigma_R$ | $\sigma_{R+}$ | $\lambda_{\max, \text{abs}}$ [nm] | $\tilde{\nu}_{\max, \text{abs}}$ [ $\text{cm}^{-1}$ ] | $\lambda_{\max, \text{em}}$ [nm] | $\tilde{\nu}_{\max, \text{em}}$ [ $\text{cm}^{-1}$ ] | $\Delta\tilde{\nu}$ [ $\text{cm}^{-1}$ ] |
|------------|---------------|---------------|------------|---------------|-----------------------------------|-------------------------------------------------------|----------------------------------|------------------------------------------------------|------------------------------------------|
| -0.27      | -0.78         | -0.27         | -0.43      | -1.07         | 330                               | 30300                                                 | 461                              | 21700                                                | 8600                                     |
| 0.05       | -0.43         | 0.05          | -0.14      | -0.56         | 347                               | 28800                                                 | 488                              | 20500                                                | 8300                                     |
| 0.06       | -0.18         | 0.06          | -0.08      | -0.3          | 330                               | 30300                                                 | 471                              | 21200                                                | 9100                                     |
| 0.23       | 0.11          | 0.23          | -0.16      | -0.31         | 333                               | 30000                                                 | 488                              | 20500                                                | 9500                                     |
| 0.66       | 0.66          | 0.66          | 0.16       | 0.15          | 373                               | 26800                                                 | 520                              | 19200                                                | 7600                                     |

### Absorption bands

$$\sigma_p: \tilde{\nu}_{\max, \text{abs}} = -3636.2 \cdot \sigma_p + 29784 \text{ [cm}^{-1}\text{]} \quad (R^2 = 0.6796)$$

$$\sigma_{p+}: \tilde{\nu}_{\max, \text{abs}} = -1962.7 \cdot \sigma_{p+} + 29009 \text{ [cm}^{-1}\text{]} \quad (R^2 = 0.514)$$

$$\sigma_{p-}: \tilde{\nu}_{\max, \text{abs}} = -2987.8 \cdot \sigma_{p-} + 29934 \text{ [cm}^{-1}\text{]} \quad (R^2 = 0.8763)$$

$$\sigma_R: \tilde{\nu}_{\max, \text{abs}} = -5574.6 \cdot \sigma_R + 28528 \text{ [cm}^{-1}\text{]} \quad (R^2 = 0.6154)$$

$$\sigma_{R+}: \tilde{\nu}_{\max, \text{abs}} = -2272.2 \cdot \sigma_{R+} + 28303 \text{ [cm}^{-1}\text{]} \quad (R^2 = 0.4568)$$

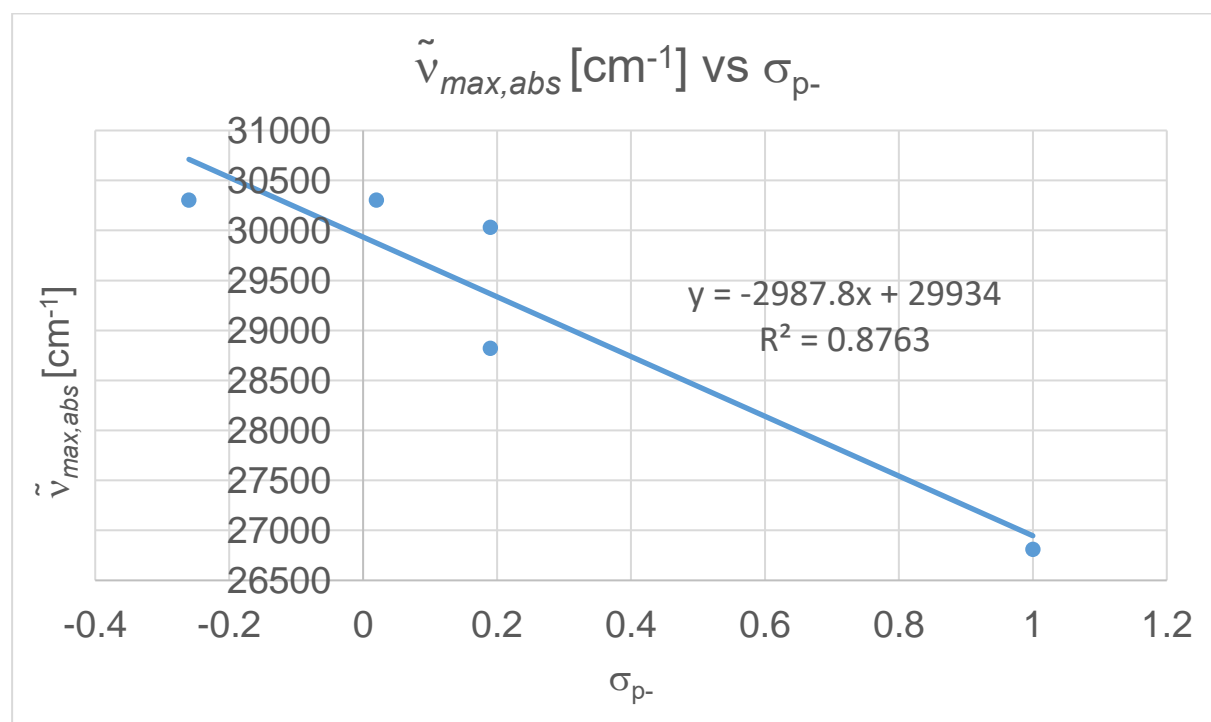

**Figure S27.** Hammett correlation of  $E_0^{0/+1}$  of compounds **8b-f** against  $\sigma_{p-}$ .



## Emission bands

$$\sigma_p: \tilde{\nu}_{\max,em} = -2627.5 \cdot \sigma_p + 21011 \text{ [cm}^{-1}\text{]} (R^2 = 0.9129)$$

$$\sigma_{p+}: \tilde{\nu}_{\max,em} = -1518.9 \cdot \sigma_{p+} + 20439 \text{ [cm}^{-1}\text{]} (R^2 = 0.792)$$

$$\sigma_{p-}: \tilde{\nu}_{\max,em} = -1946 \cdot \sigma_{p-} + 21071 \text{ [cm}^{-1}\text{]} (R^2 = 0.9564)$$

$$\sigma_R: \tilde{\nu}_{\max,em} = -3878.2 \cdot \sigma_R + 20123 \text{ [cm}^{-1}\text{]} (R^2 = 0.7664)$$

$$\sigma_{R+}: \tilde{\nu}_{\max,em} = -1778.9 \cdot \sigma_{R+} + 19884 \text{ [cm}^{-1}\text{]} (R^2 = 0.7204)$$

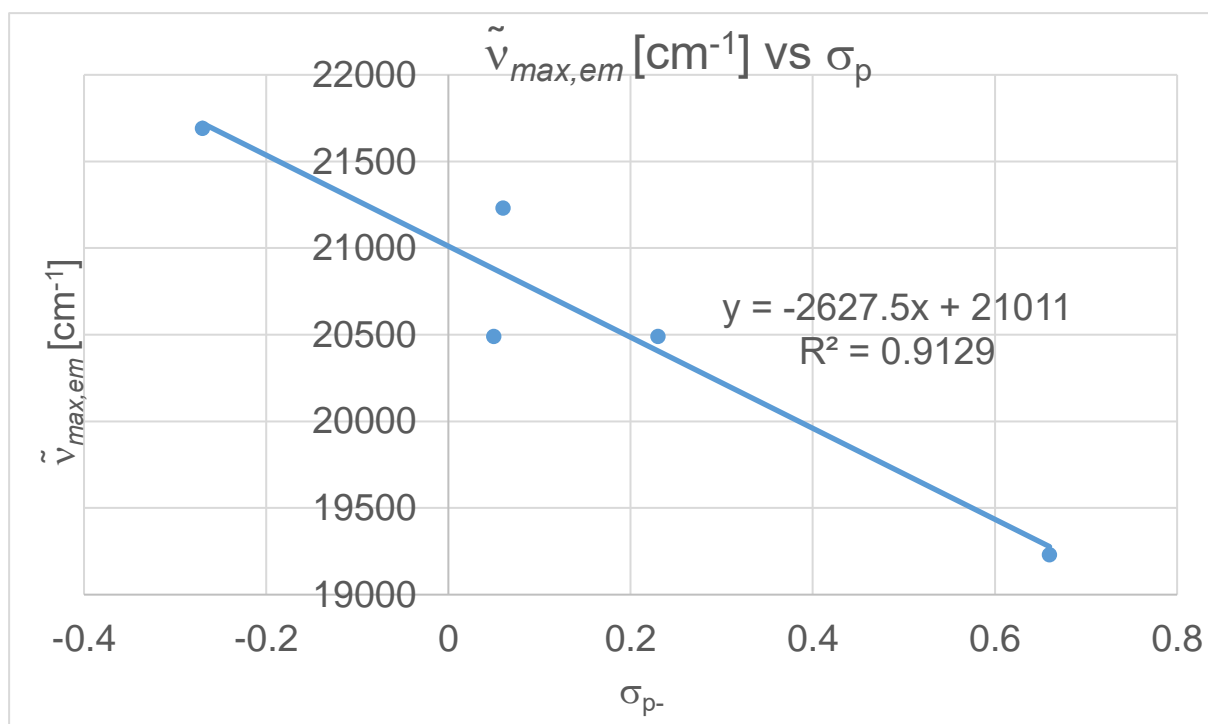

**Figure S28.** Hammett correlation of  $E_0^{0/+1}$  of compounds **8b-f** against  $\sigma_p$ .

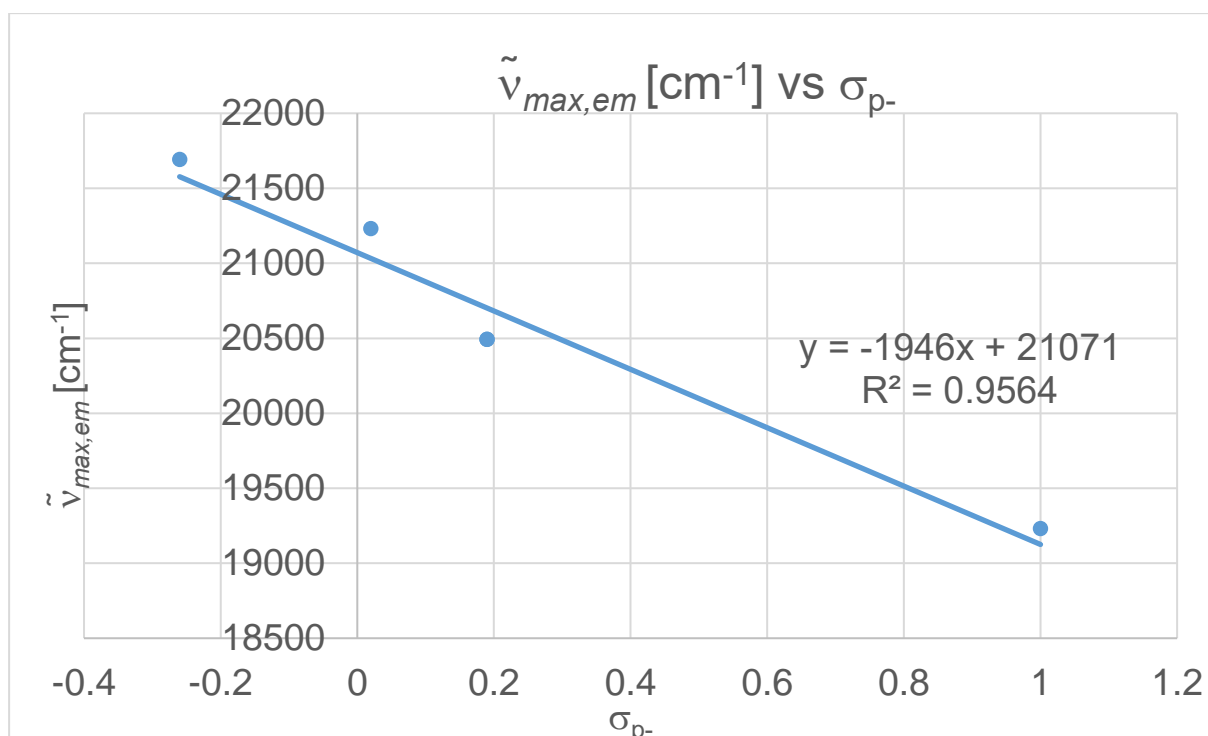

**Figure S29.** Hammett correlation of  $E_0^{0/+1}$  of compounds **8b-f** against  $\sigma_{p-}$ .

### Stokes shifts

$$\sigma_p: \Delta\tilde{\nu} = -1008.8 \cdot \sigma_p + 8772.6 [cm^{-1}] (R^2 = 0.2116)$$

$$\sigma_{p+}: \Delta\tilde{\nu} = -443.81 \cdot \sigma_{p+} + 8570.3 [cm^{-1}] (R^2 = 0.1063)$$

$$\sigma_{p-}: \Delta\tilde{\nu} = -1041.8 \cdot \sigma_{p-} + 8862.8 [cm^{-1}] (R^2 = 0.4309)$$

$$\sigma_R: \Delta\tilde{\nu} = -1696.4 \cdot \sigma_R + 8404.8 [cm^{-1}] (R^2 = 0.2305)$$

$$\sigma_{R+}: \Delta\tilde{\nu} = -493.28 \cdot \sigma_{R+} + 8419.1 [cm^{-1}] (R^2 = 0.0871)$$

### Compounds 8

**Table S4.** Selected Hammett parameters and  $\lambda_{max,abs}$ ,  $\tilde{\nu}_{max,abs}$ ,  $\lambda_{max,em}$ ,  $\tilde{\nu}_{max,em}$ , and  $\Delta\tilde{\nu}$  of compounds **8b-f**.

| $\sigma_p$ | $\sigma_{p+}$ | $\sigma_{p-}$ | $\sigma_R$ | $\sigma_{R+}$ | $\lambda_{max,abs} [nm]$ | $\tilde{\nu}_{max,abs} [cm^{-1}]$ | $\lambda_{max,em} [nm]$ | $\tilde{\nu}_{max,em} [cm^{-1}]$ | $\Delta\tilde{\nu} [cm^{-1}]$ |
|------------|---------------|---------------|------------|---------------|--------------------------|-----------------------------------|-------------------------|----------------------------------|-------------------------------|
| -0.27      | -0.78         | -0.27         | -0.43      | -1.07         | 324                      | 30900                             | 455                     | 22000                            | 8900                          |
| 0.05       | -0.43         | 0.05          | -0.14      | -0.56         | 326                      | 30700                             | 466                     | 21500                            | 9200                          |
| 0.06       | -0.18         | 0.06          | -0.08      | -0.3          | 323                      | 31000                             | 456                     | 21900                            | 9000                          |
| 0.23       | 0.11          | 0.23          | -0.16      | -0.31         | 342                      | 29200                             | 478                     | 20900                            | 8300                          |
| 0.66       | 0.66          | 0.66          | 0.16       | 0.15          | 359                      | 27900                             | 500                     | 20000                            | 7900                          |

## Absorption

$$\sigma_p: \tilde{\nu}_{\max, \text{abs}} = -3630 \cdot \sigma_p + 30449 \text{ [cm}^{-1}\text{]} (R^2 = 0.8356)$$

$$\sigma_{p+}: \tilde{\nu}_{\max, \text{abs}} = -2245.4 \cdot \sigma_{p+} + 29640 \text{ [cm}^{-1}\text{]} (R^2 = 0.8299)$$

$$\sigma_{p-}: \tilde{\nu}_{\max, \text{abs}} = -2583.2 \cdot \sigma_{p-} + 30508 \text{ [cm}^{-1}\text{]} (R^2 = 0.8081)$$

$$\sigma_R: \tilde{\nu}_{\max, \text{abs}} = -4601.5 \cdot \sigma_R + 29321 \text{ [cm}^{-1}\text{]} (R^2 = 0.5173)$$

$$\sigma_{R+}: \tilde{\nu}_{\max, \text{abs}} = -2327 \cdot \sigma_{R+} + 28946 \text{ [cm}^{-1}\text{]} (R^2 = 0.5911)$$

## Emission

$$\sigma_p: \tilde{\nu}_{\max, \text{em}} = -2627.5 \cdot \sigma_p + 21011 \text{ [cm}^{-1}\text{]} (R^2 = 0.9129)$$

$$\sigma_{p+}: \tilde{\nu}_{\max, \text{em}} = -1367.9 \cdot \sigma_{p+} + 21088 \text{ [cm}^{-1}\text{]} (R^2 = 0.8272)$$

$$\sigma_{p-}: \tilde{\nu}_{\max, \text{em}} = -1655.3 \cdot \sigma_{p-} + 21635 \text{ [cm}^{-1}\text{]} (R^2 = 0.8911)$$

$$\sigma_R: \tilde{\nu}_{\max, \text{em}} = -3035.6 \cdot \sigma_R + 20863 \text{ [cm}^{-1}\text{]} (R^2 = 0.6046)$$

$$\sigma_{R+}: \tilde{\nu}_{\max, \text{em}} = -1474.2 \cdot \sigma_{R+} + 20641 \text{ [cm}^{-1}\text{]} (R^2 = 0.6371)$$

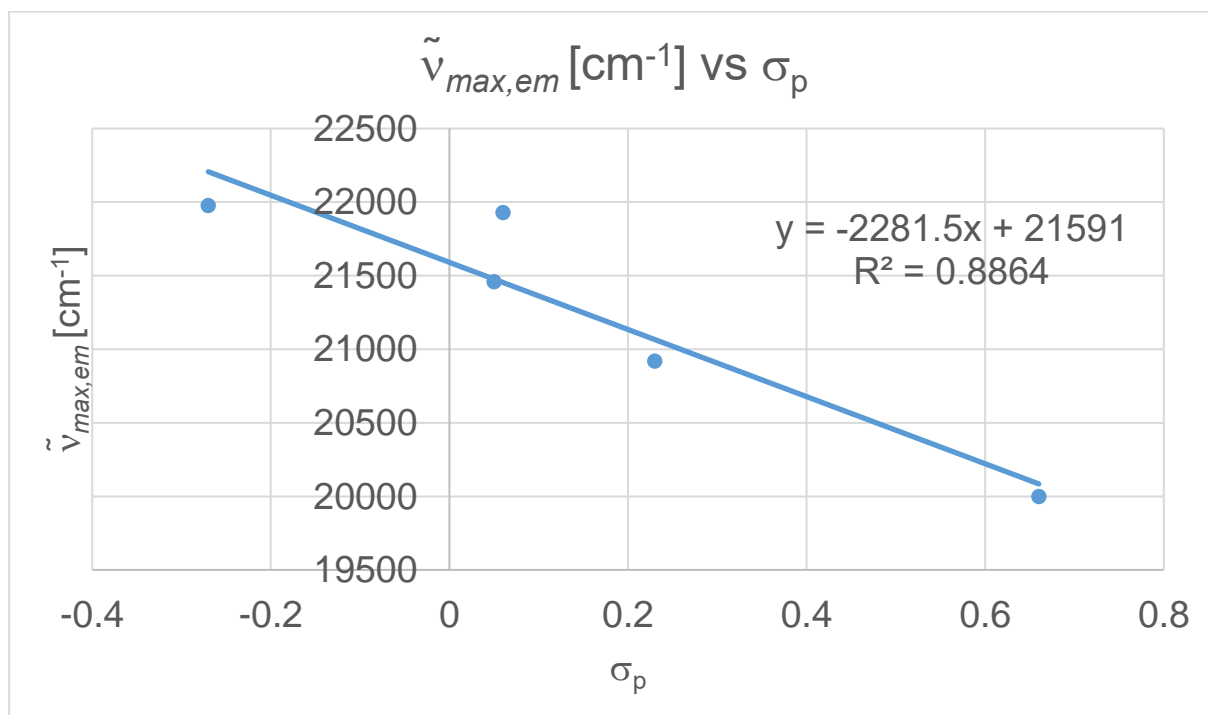

**Figure S30.** Hammett correlation of  $\tilde{\nu}_{\max, \text{em}}$  of compounds **8b-f** against  $\sigma_p$ .

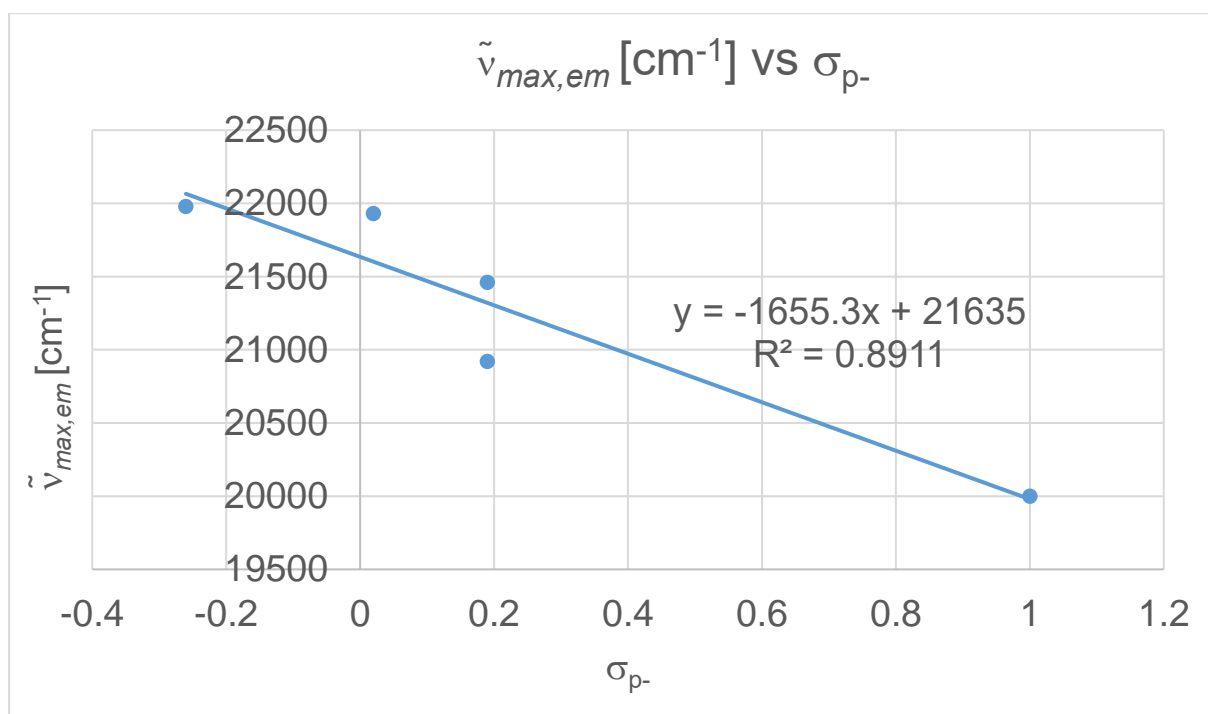

**Figure S31.** Hammett correlation of  $\tilde{\nu}_{max,em}$  of compounds **8b-f** against  $\sigma_{p-}$ .

### Stokes

$$\sigma_p: \Delta\tilde{\nu} = -1348.5 \cdot \sigma_p + 8858.1 [cm^{-1}] (R^2 = 0.6649)$$

$$\sigma_{p+}: \Delta\tilde{\nu} = -877.41 \cdot \sigma_{p+} + 8552.4 [cm^{-1}] (R^2 = 0.7307)$$

$$\sigma_{p-}: \Delta\tilde{\nu} = -927.92 \cdot \sigma_{p-} + 8872.8 [cm^{-1}] (R^2 = 0.6013)$$

$$\sigma_R: \Delta\tilde{\nu} = -1565.9 \cdot \sigma_R + 8457.7 [cm^{-1}] (R^2 = 0.3454)$$

$$\sigma_{R+}: \Delta\tilde{\nu} = -852.78 \cdot \sigma_{R+} + 8304.8 [cm^{-1}] (R^2 = 0.4578)$$
